# Supplementary material
Source: PubMed Central journal article supplement (PMC6697185)
Supplement: EMS83956-supplement-Supplementary_Figures.pdf [file EMS83956-supplement-Supplementary_Figures.pdf]

A

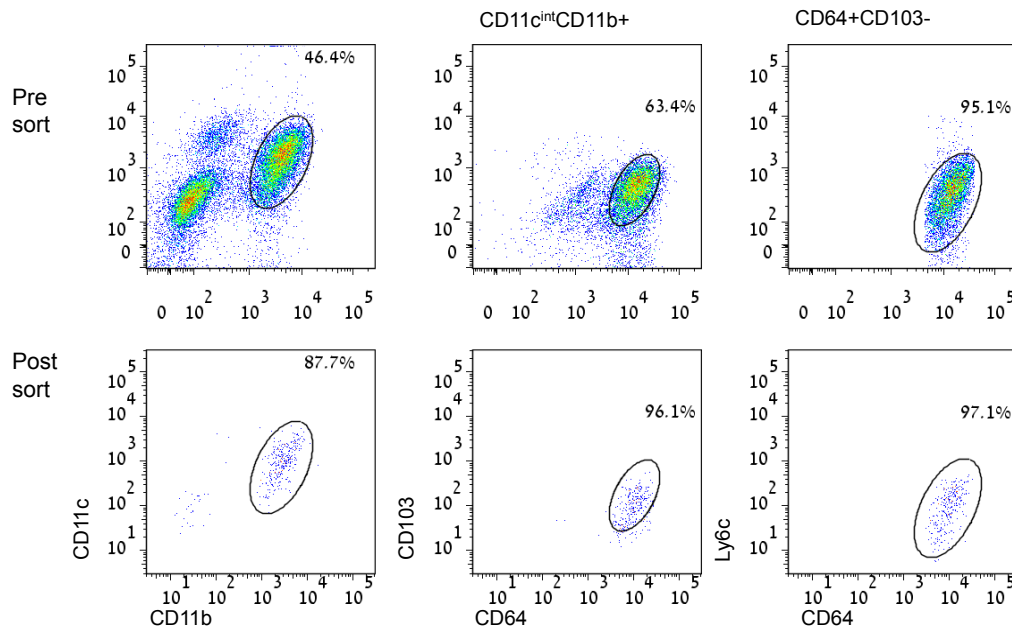

B

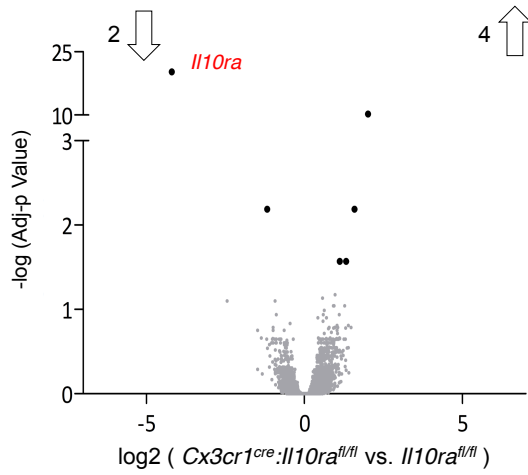

C

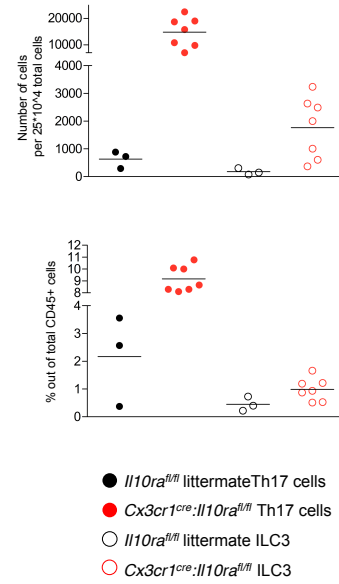

Supp Figure 1

**Supplementary Figure 1. Gating strategies and transcriptome analysis of animals exposed to antibiotics**

This figure includes data related to main text Figures 1 and 3

**(A)** Gating strategy for sorting colonic lamina propria macrophages

**(B)** Volcano plot of statistical significance ( $-\log_{10}$  p-value) against  $\log_2$  ratio of macrophages sorted from the colonic lamina propria of *Cx3cr1<sup>cre</sup>:Il10ra<sup>fl/fl</sup>* and *Il10ra<sup>fl/fl</sup>* co-housed littermates continuously treated with broad spectrum antibiotics given upon weaning, based on RNA-seq data. Significantly up or down regulated genes (fold change > 2, adj-p value < 0.05) are in black. Cre transgene positive mice were collected from 2 independent experiments (n=2 in each), littermates are from one experiment (n=3).

**(C)** Quantification of flow cytometry analysis presented in Fig1F.

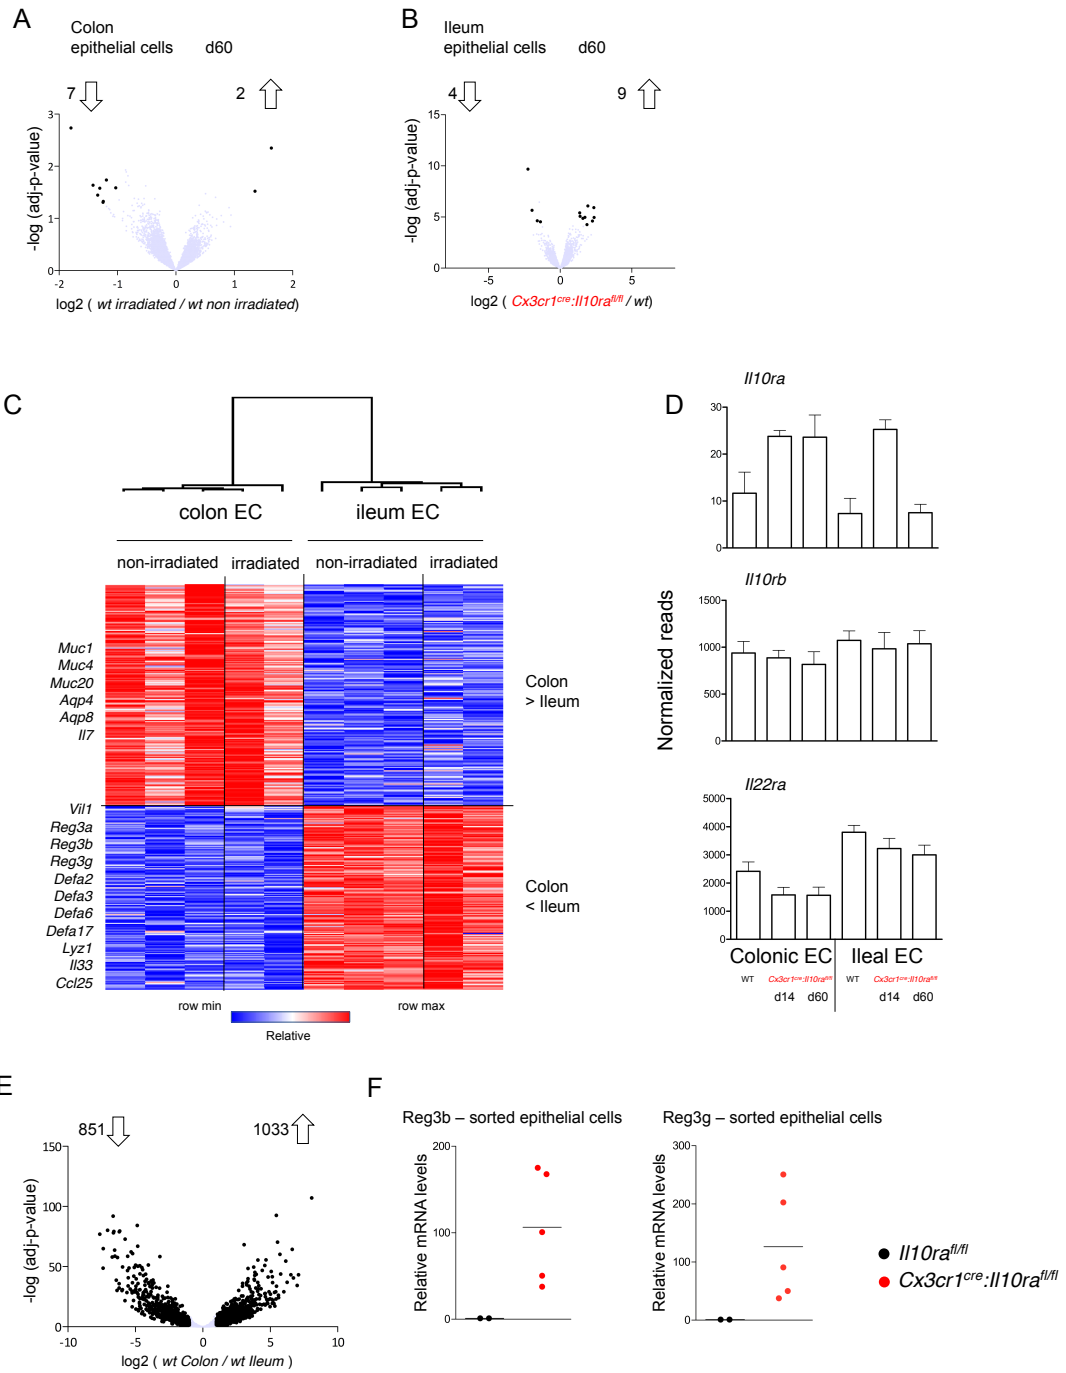

Supp Figure 2

**Supplementary Figure 2. Transcriptome analysis of epithelial cells of *Villin<sup>cre</sup>:R26-tdTomato* mice.**

This figure includes data related to main text Figure 2

**(A-B)** Volcano plot of statistical significance ( $-\log_{10}$  p-value) against log 2 ratio based on RNA-seq data between A - colonic epithelial cells sorted from [*Cx3cr1<sup>gfp/+</sup>* > *Villin<sup>cre</sup>:r26-tdTomato*] BM chimeras and *Villin<sup>cre</sup>:r26-tdTomato* mice or B – ileal epithelial cells sorted from [*Cx3cr1<sup>cre</sup>Il10ra<sup>fl/fl</sup>* > *Villin<sup>cre</sup>:r26-tdTomato*] BM chimeras and *Villin<sup>cre</sup>:r26-tdTomato* mice.

Significantly up or down regulated genes (fold change > 2, adj-p value < 0.05) are in black.

**(C)** Heat map displaying RNA-seq data of sorted colonic and ileal epithelial cells from [*Cx3cr1<sup>gfp/+</sup>* > *Villin<sup>cre</sup>:r26-tdTomato*] BM chimeras and *Villin<sup>cre</sup>:r26-tdTomato* mice. Presented are 1884 genes significantly differentially expressed (fold change > 2, adj-p value < 0.05) between colon and ileum. Normalized read number were log transformed and clustered by a Pearson correlation test and number of partition clusters was set to two. Samples were hierarchically clustered by a Pearson correlation test.

**(D)** RNA-seq normalized read numbers of indicated genes expressed by colonic and ileal epithelial cells extracted from *Villin<sup>cre</sup>:r26-tdTomato* mice and [*Cx3cr1<sup>cre</sup>Il10ra<sup>fl/fl</sup>* > *Villin<sup>cre</sup>:r26-tdTomato*] BM chimeras at indicated time points.

**(E)** Volcano plot of statistical significance ( $-\log_{10}$  p-value) against log 2 ratio between colonic and ileal epithelial cells sorted from *Villin<sup>cre</sup>:r26-tdTomato* mice based on RNA-seq data. Significantly up or down regulated genes (fold change > 2, adj-p value < 0.05) are in black.

**(F)** qRT-PCR analysis of *reg3b* and *reg3g* expression in sorted colonic epithelial cells (CD45-fraction) of *Cx3cr1<sup>cre</sup>:Il10ra<sup>fl/fl</sup>* mice and littermate controls

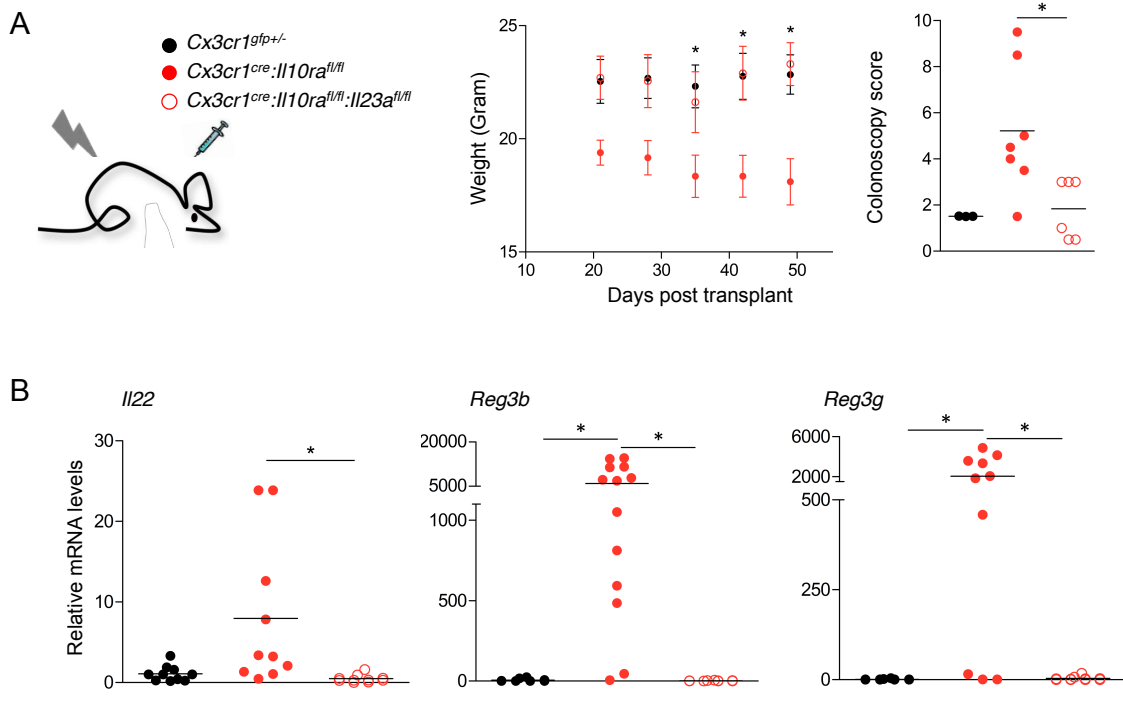

**Supplementary Figure 3. Lack of neutrophil infiltrates in the *lamina propria* of *Cx3cr1<sup>cre</sup>:Il10ra<sup>fl/fl</sup>:Il23a<sup>fl/fl</sup>* mice.**

This figure includes data related to main text Figure 6

**(A)** Representative plots of flow cytometry analysis of the colonic *lamina propria* of indicated mouse strains.

**(B)** Quantification of flow cytometry analysis according to gating strategy indicated in A. data are from one experiment.

A

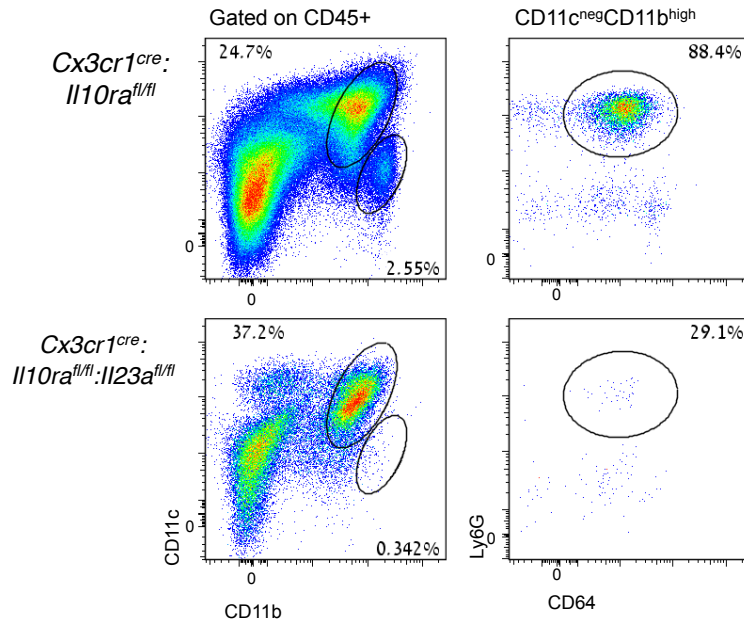

B

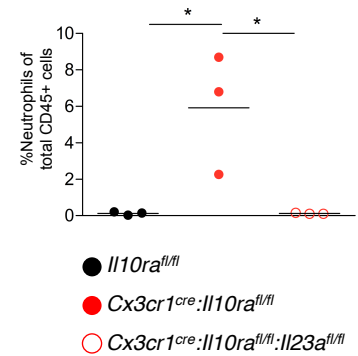

**Supplementary Figure 4. Macrophage-derived Il23a is critical for colitis induction in BM chimeras model.**

This figure includes data related to main text Figure 3

**(A)** Weight and colonoscopic analysis of [ *Cx3cr1*<sup>cre</sup>:*Il10ra*<sup>fl/fl</sup> > WT ], [ *Cx3cr1*<sup>gfp/+</sup> > WT ] or [ *Cx3cr1*<sup>cre</sup>:*Il10ra*<sup>fl/fl</sup>:*Il23a*<sup>fl/fl</sup> > WT ] BM chimeras. Colonoscopy was performed 6 weeks post-transplant.

**(B)** qRT-PCR analysis of *il22*, *reg3b* and *reg3g* expression in colonic whole tissue RNA extracts of indicated BM chimeric mice.

Data are collected from 2 independent experiments, n>=3 in each.

**A** [CD45.2->CD45.1] BM chimeras  
– blood analysis

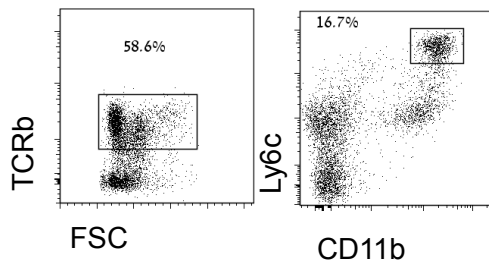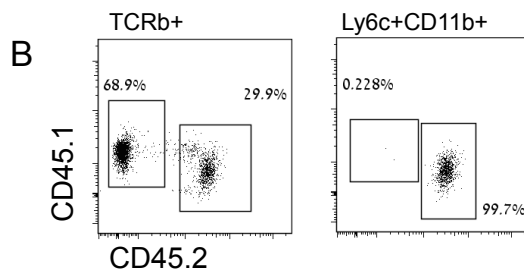

**C**

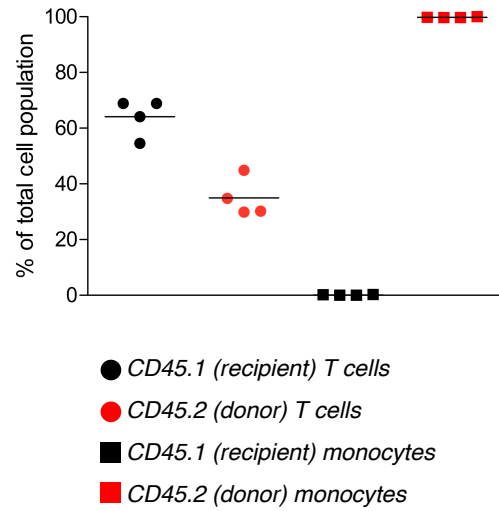

**Supplementary Figure 5. Chimerism of blood monocytes and T cells.**

**(A-B)** Representative flow cytometry analysis of blood withdrawn from [CD45.2>CD45.1] BM chimeras one month post transfer.

**(C)** Quantification of flow cytometry analysis presented in A-B.

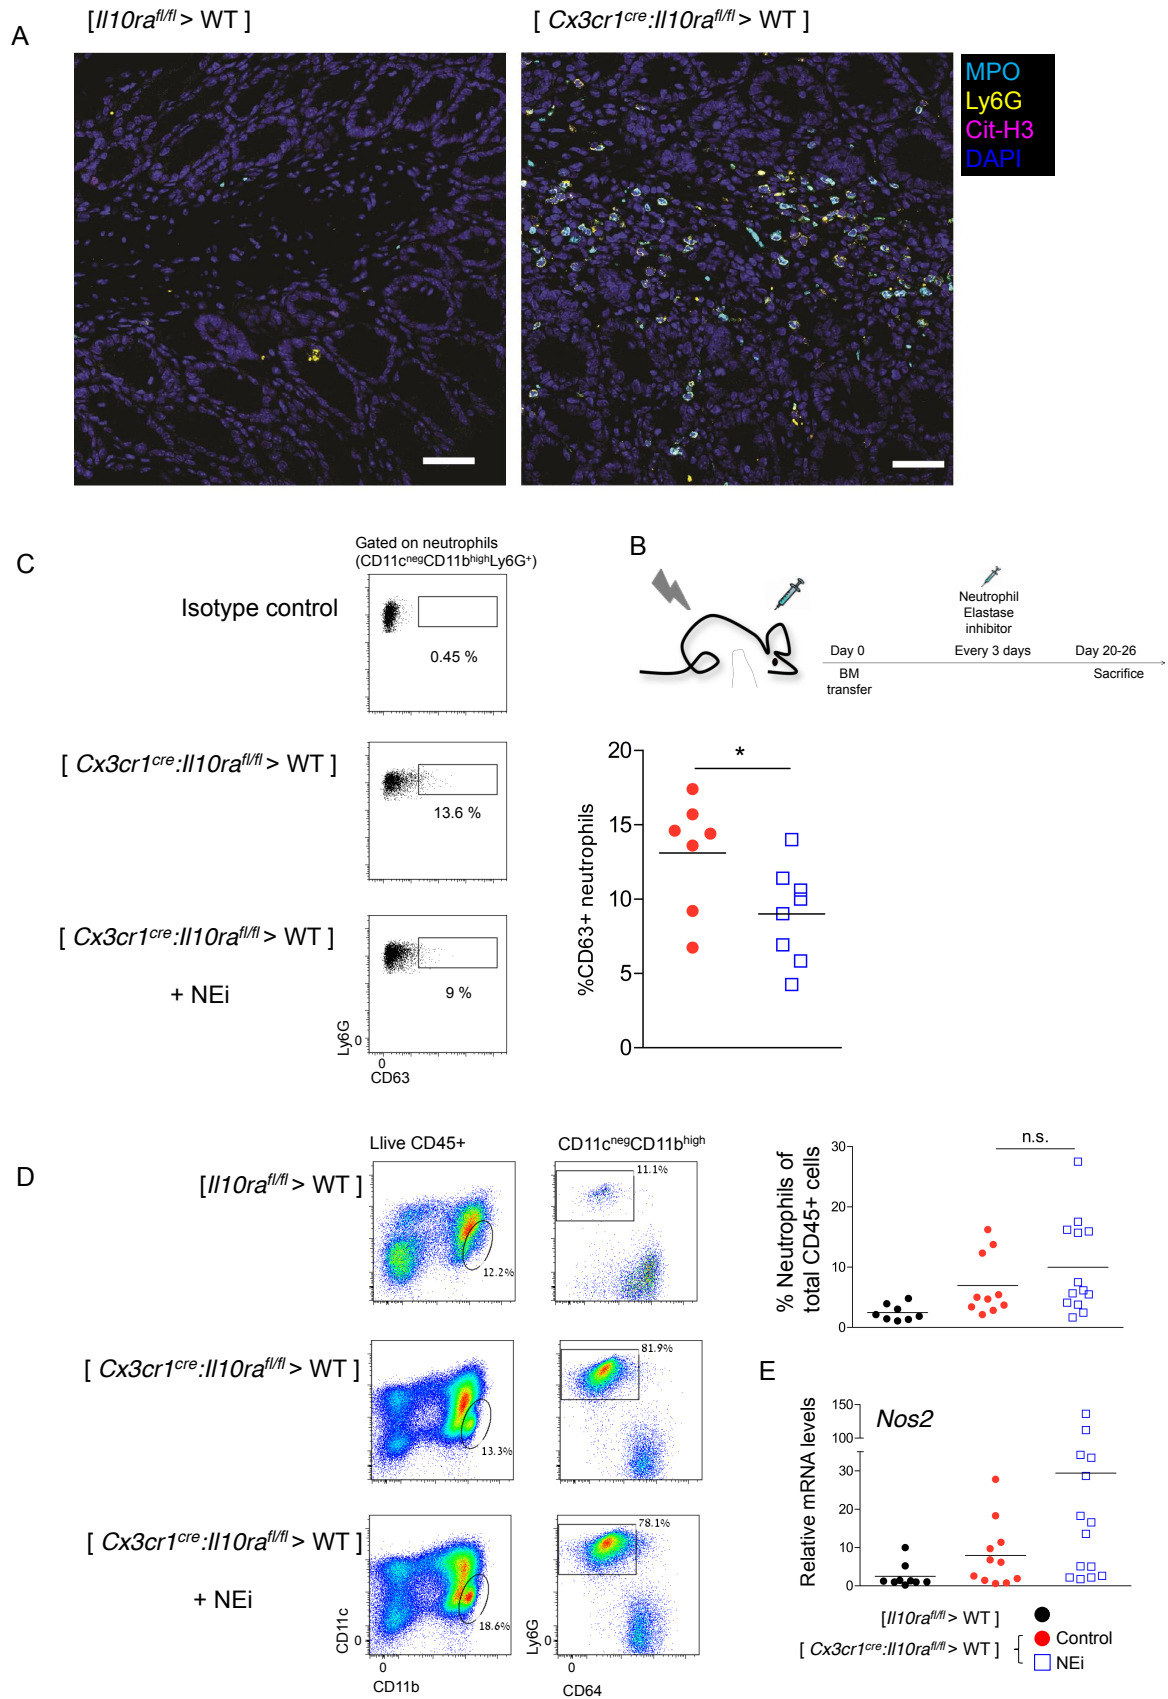

Supp Figure 6



**Supplementary Figure 6. Analysis of neutrophil elastase inhibitor (NEi) treated BM chimeras**

**(A)** Representative immunofluorescence images of the colonic tissue of [ *Il10ra<sup>fl/fl</sup>* > WT ] or [ *Cx3cr1<sup>cre</sup>:Il10ra<sup>fl/fl</sup>* > WT ] BM chimeras.

**(B)** Schematic of NEi treatment

**(C)** Representative plots of flow cytometry analysis of the colonic *lamina propria* of [ *Il10ra<sup>fl/fl</sup>* > WT ] or [ *Cx3cr1<sup>cre</sup>:Il10ra<sup>fl/fl</sup>* > WT ] BM chimeras left untreated or treated with NEi (left).

Quantification of flow cytometry analysis (right). qRT-PCR analysis of *Nos2* expression in whole tissue extracts of colons of indicated BM chimeric mice (right).

**(D)** Representative plots of flow cytometry analysis of CD63 staining of neutrophils extracted from the colonic *lamina propria* of [ *Cx3cr1<sup>cre</sup>:Il10ra<sup>fl/fl</sup>* > WT ] BM chimeras left untreated or treated with NEi (left). Quantification of flow cytometry analysis (right).

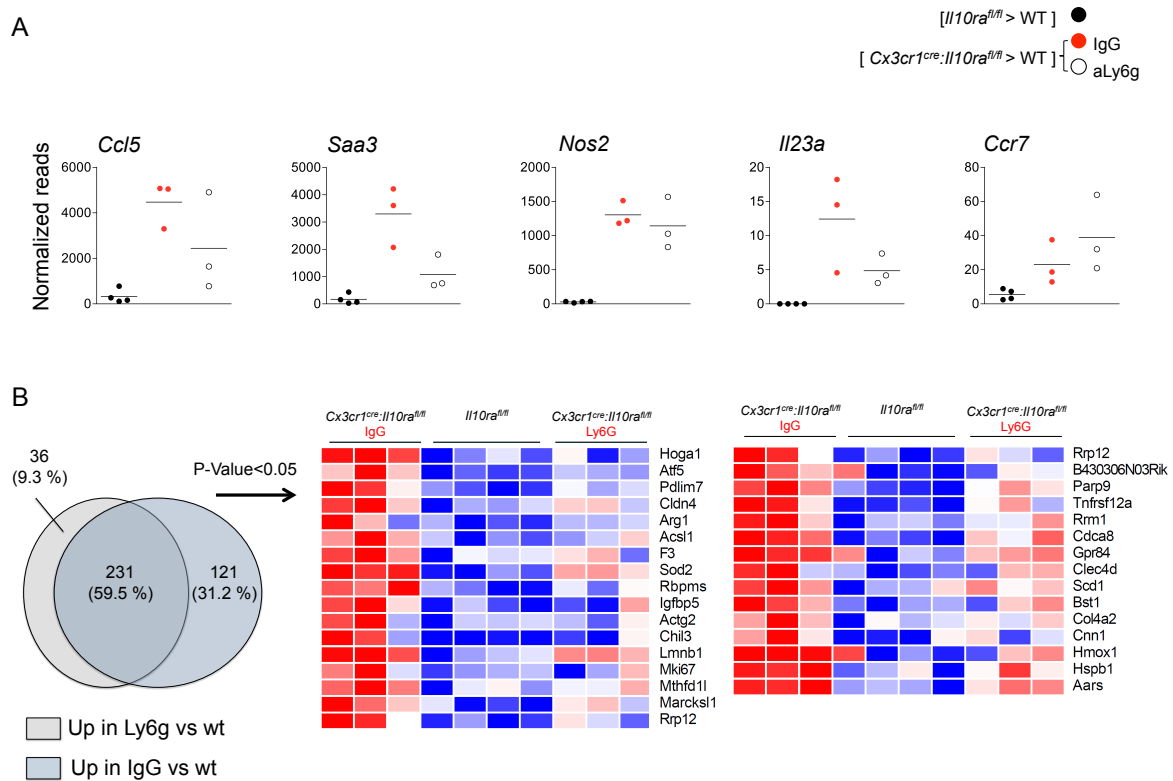

**Supplementary Figure 7. Analysis of transcriptomes of macrophages retrieved from BM chimeras treated with control IgG or neutrophil-depleting anti-Ly6G antibody.**

**(A)** RNA-seq normalized read numbers for single genes of interest are plotted separately, each dot represents one mouse.

**(B)** Venn diagram and heatmap of RNAseq data of colonic macrophages extracted from [ *Cx3cr1<sup>cre</sup>:Il10ra<sup>fl/fl</sup>* > WT ] BM chimeras treated with IgG control or anti Ly6G antibody. Normalized reads number were log transformed. Presented are genes of interest, significantly up-regulated in anti Ly6g treated vs WT control and unaltered in IgG treated vs WT.

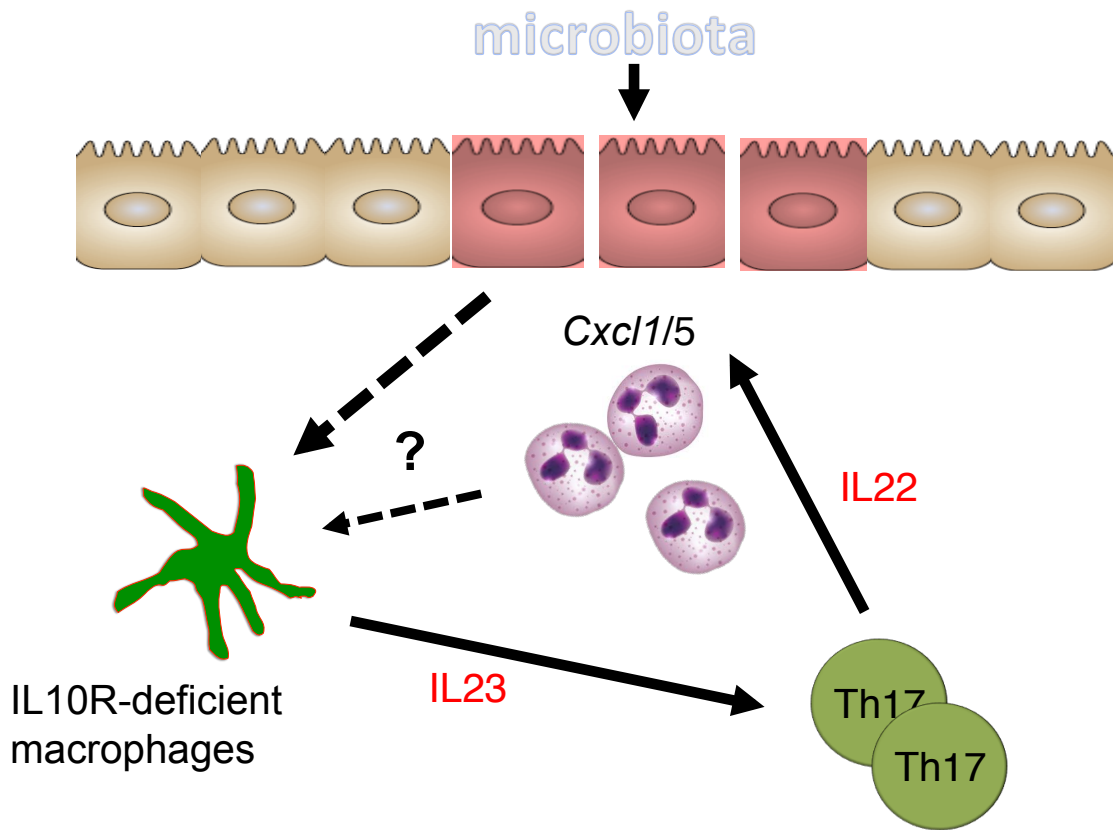

**Supplementary Figure 8. Summary schematic illustrating the finding of this study.**

In response to a microbial stimulus IL10R-deficient macrophage secrete IL-23 that induces Th17 cells to produce IL-22. IL-22 in turn activates epithelial cells to produce chemokines that recruit neutrophils that cause tissue damage. Our results suggest that the full pro-inflammatory signature of macrophages is a secondary effect induced by epithelial response or the tissue damage.
